# Supplementary material
Source: ML conference proceedings conference paper supplement (https://openreview.net/forum?id=vpQuCsZXz2)
Supplement: supplementary_material [file attachment]

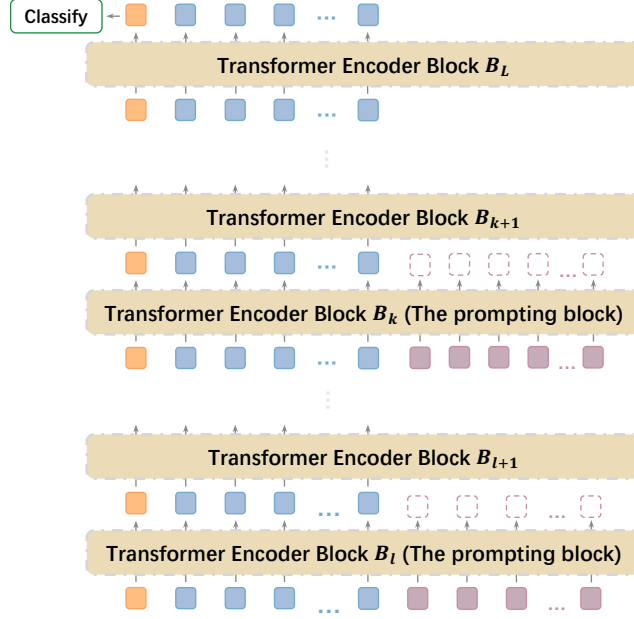

Figure 6: The illustration of TransHP with multiple layers of hierarchy.  $k$  and  $l$  are two insider layers, and  $L$  is the final layer.

Table 5: The balance parameters used for  $\mathcal{L}_{coarse}$  of different levels (The last 1 is the balance parameter for the final classification.). “-” denotes that this transformer layer does not have prompt tokens.

| $\lambda$        | 0   | 1   | 2   | 3   | 4   | 5    | 6    | 7    | 8    | 9 | 10 | 11 |
|------------------|-----|-----|-----|-----|-----|------|------|------|------|---|----|----|
| ImageNet         | 0.1 | 0.1 | 0.1 | 0.1 | 0.1 | 0.15 | 0.15 | 0.15 | 0.15 | 1 | 1  | 1  |
| iNaturalist-2018 | -   | -   | -   | -   | -   | -    | 1    | -    | -    | - | -  | 1  |
| iNaturalist-2019 | -   | -   | -   | -   | -   | -    | 1    | -    | -    | - | -  | 1  |
| CIFAR-100        | -   | -   | -   | -   | -   | -    | -    | -    | 1    | - | -  | 1  |
| DeepFashion      | -   | -   | -   | -   | -   | -    | 0.5  | -    | 1    | - | -  | 1  |

## A Multiple layers of hierarchy

We illustrate the TransHP in Fig. 6 when a dataset has multiple layers of hierarchy.

## B Coarse-level classes of CIFAR-100

[0]: aquatic mammals, [1]: fish, [2]: flowers, [3]: food containers, [4]: fruit and vegetables, [5]: household electrical devices, [6]: household furniture, [7]: insects, [8]: large carnivores, [9]: large man-made outdoor things, [10]: large natural outdoor scenes, [11]: large omnivores and herbivores, [12]: medium mammals, [13]: non-insect invertebrates, [14]: people, [15]: reptiles, [16]: small mammals, [17]: trees, [18]: vehicles-1, and [19]: vehicles-2.

## C Dataset details

The hierarchical labels of ImageNet are from WordNet [1], with details illustrated on Mike’s website. Both the iNaturalist-2018/2019 have two-level hierarchical annotations: a super-category (14/6 classes) for the genus, and 8, 142/1, 010 categories for the species. CIFAR-100 also has two-level hierarchical annotations: the coarse level has 20 classes, and the fine level has 100 classes. DeepFashion-inshop is a retrieval dataset with three-level hierarchy. To modify it for the classification task, we random select 1/2 images from each class for training, and the remaining 1/2 images for

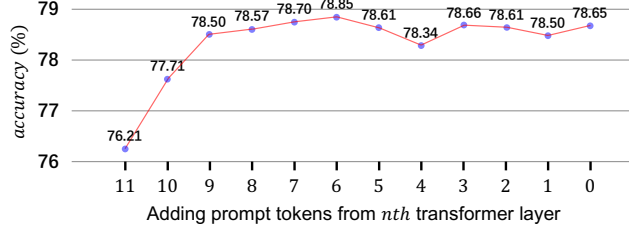

Figure 7: The top-1 accuracy on ImageNet *w.r.t* the transformer layer from which to add prompt tokens. The highest two transformer layers (which do not have too coarse-level labels) play an important role.

Table 6: The analysis of the number of coarse-level classes on the CIFAR-100 dataset. “ $N$ -class” denotes that there are  $N$  classes for the coarse-level classification.

| Accuracy (%) | baseline | 2-class | 5-class | 10-class | 20-class |
|--------------|----------|---------|---------|----------|----------|
| w/o Pre      | 61.77    | 63.34   | 63.12   | 64.47    | 67.09    |
| w Pre        | 84.98    | 86.40   | 86.35   | 86.50    | 86.85    |

validation. Both the training and validation set contain 2 coarse classes, 17 middle classes, and 7, 982 fine classes, respectively.

## D The balance parameters of different datasets

Please refer to Table 5 for the positions to insert prompt and corresponding balance parameters.

## E Importance analysis of classification at different hierarchical levels

From Table 5 (Line 1), each transformer layer is responsible for one level classification. We remove the prompt tokens from the coarsest level to the finest level. In Fig. 7,  $n$  denotes that the prompt tokens are added from the  $n$ th transformer layer. We conclude that only the last two coarse level classifications (arranged at the 9th and 10th transformer layer) contribute most to the final classification accuracy. That means: (1) it is not necessary that the number of hierarchy and transformer layers are equal. (2) it is no need to adjust any parameters from too coarse level hierarchy. (Note that: though the current balance parameter for the 8th transformer layer is 0.15, when it is enlarged to 1, no further improvement is achieved.)

## F Analysis of the number of coarse-level classes

As shown in Supplementary B, the CIFAR-100 dataset has 20 coarse-level classes. When we combine them into 10 coarse-level classes, we have ([0-1]), ([2-17]), ([3-4]), ([5-6]), ([12-16]), ([8-11]), ([14-15]), ([9-10]), ([7-13]), and ([18-19]). When we combine them into 5 coarse-level classes, we have ([0-1-12-16]), ([2-17-3-4]), ([5-6-9-10]), ([8-11-18-19]), and ([7-13-14-15]). When we combine them into 2 coarse-level classes, we have ([0-1-7-8-11-12-13-14-15-16]) and ([2-3-4-5-6-9-10-17-18-19]). The experimental results are listed in Table 6.

We observe that: 1) Generally, using more coarse-level classes is better. 2) Using only 2 coarse-level classes still brings over 1% accuracy improvement.

## G The comparison with the “No prompts” baseline

In this section, we provide more experiments with the “No prompts” baseline. The detail of the “No prompts” baseline is shown in Fig. 4 (2). The experimental results are shown in Table 7. We find that

Table 7: Comparison between TransHP with the original baseline and the “No prompts” baseline.

| Accuracy (%)         | iNat-2018    | iNat-2019    | CIFAR-100    | DeepFashion  |
|----------------------|--------------|--------------|--------------|--------------|
| Baseline (w/o Pre)   | 51.07        | 57.33        | 61.77        | 83.42        |
| No prompts (w/o Pre) | 51.88        | 58.45        | 63.78        | 84.23        |
| TransHP (w/o Pre)    | <b>53.22</b> | <b>59.24</b> | <b>67.09</b> | <b>85.72</b> |
| Baseline (w Pre)     | 63.01        | 69.31        | 84.98        | 88.54        |
| No prompts (w Pre)   | 63.41        | 70.73        | 85.50        | 89.59        |
| TransHP (w Pre)      | <b>64.21</b> | <b>71.62</b> | <b>86.85</b> | <b>89.93</b> |

Table 8: The top-1 accuracy of TransHP on some other datasets (besides ImageNet) with standard ViT-B/16 backbone. “w Pre” or “w/o Pre” denotes the models are trained from ImageNet pre-training or from scratch, respectively.

| Accuracy (%)       | iNaturalist-2018 | iNaturalist-2019 | CIFAR-100 | DeepFashion |
|--------------------|------------------|------------------|-----------|-------------|
| ViT-B/16 (w/o Pre) | 52.96            | 58.24            | 62.91     | 84.28       |
| TransHP (w/o Pre)  | 54.33            | 60.14            | 69.32     | 86.82       |
| ViT-B/16 (w Pre)   | 64.10            | 70.22            | 87.13     | 89.14       |
| TransHP (w Pre)    | 66.43            | 73.14            | 88.76     | 90.31       |

though “No prompts” baseline surpasses the original baseline, our TransHP still shows significant superiority over this baseline.

## H More experiments with the ViT-B/16 backbone

In this section, we provide more experiments with the standard ViT-B/16 backbone. The experimental results are shown in Table 8. We find that no matter with pre-trained models or without, the TransHP achieves consistent improvement on all these datasets.

## I Additional $L_{coarse}$ with DeiT.

We introduce the experimental results by only adopting  $L_{coarse}$  in DeiT. Note that the  $L_{coarse}$  is imposed on the class token as shown in Fig. 4 (2). We find that the TransHP still shows performance improvement compared with only using  $L_{coarse}$  on DeiT-S and DeiT-B: compared with DeiT-S (79.82%) and DeiT-B (81.80%), “only with  $L_{coarse}$ ” achieves 79.98% and 81.76% while the TransHP achieves 80.55% and 82.35%, respectively.

## J Efficiency Comparison

Due to the increase of parameters (+2.7% on our baseline and +1.4% on ViT-B for ImageNet) and the extra cost of the backward of several  $L_{coarse}$ s, the training time increases by 15% on our baseline and 12% on ViT-B for ImageNet. For inference, the computation overhead is very light. The baseline and TransHP both use around 50 seconds to finish the ImageNet validation with 8 A100 GPUs.
